# Supplementary material for: Systematic development of a text-driven and a video-driven web-based computer-tailored obesity prevention intervention
Source: PubMed Central journal article supplement (PMC4015713; doi:10.1186/1471-2458-13-978), 2013-10-20
Supplement: 1471-2458-13-978-S1.pdf [file 1471-2458-13-978-S1.pdf]

**Additional file 1. Table 1. Overview of performance objectives, determinants, change objectives, theoretical methods, and practical applications.**

| <b>Performance objectives</b>                                                                                       | <b>Determinants</b> | <b>Change objectives</b>                                                                                          | <b>Theoretical methods</b>                             | <b>Practical applications</b>                                                                                                                                                                                                                                                                                                                                               |
|---------------------------------------------------------------------------------------------------------------------|---------------------|-------------------------------------------------------------------------------------------------------------------|--------------------------------------------------------|-----------------------------------------------------------------------------------------------------------------------------------------------------------------------------------------------------------------------------------------------------------------------------------------------------------------------------------------------------------------------------|
| 1. Individuals decide to prevent weight gain: maintain current weight (100 kcal) or lose a little weight (200 kcal) | Knowledge           | Can explain what the energy balance is and which efforts are required to maintain weight and lose a little weight | Providing information                                  | Video-text intervention: an actor (i.e. expert in the field of nutrition and physical activity) will give factual information about the energy balance and body weight. Participants will also receive basic information about the efforts that are required to maintain weight and lose a little weight.<br>Text-text intervention: this information is described in text. |
|                                                                                                                     | Awareness           | Can express whether own body weight is healthy or not                                                             | Consciousness raising<br>Feedback                      | Video-text intervention: an actor will give feedback on participants' BMI by comparing their BMI to the BMI categories. Below the video message, participants' actual BMI will be shown.<br>Text-text intervention: this feedback is described in text.                                                                                                                     |
|                                                                                                                     | Risk perception     | Acknowledge health consequences of weight gain and obesity                                                        | Personalize risk<br>Providing information              | Video-text intervention: an actor will give feedback on participants' risk perception by giving information about participants' personal chances to gain weight in future as well as the consequences of being overweight and obese.<br>Text-text intervention: this feedback is described in text.                                                                         |
|                                                                                                                     | Self-efficacy       | Can indicate for which weight goal they have the highest level of confidence                                      | Persuasion                                             | Video-text intervention: an actor will give information about the size of the changes participants should make for maintaining weight or losing a little weight.<br>Text-text intervention: this information is described in text.                                                                                                                                          |
| 2. Individuals decide to make at least one small change in dietary intake and/or physical activity                  | Knowledge           | Can explain which small changes are required in dietary intake and/or physical activity                           | Providing information                                  | Video-text intervention: an actor will give factual information about the small changes approach as well as the required change in dietary intake and physical activity in order to maintain weight and lose a little weight.<br>Text-text intervention: this information is described in text.                                                                             |
|                                                                                                                     | Awareness           | Can express which behavior change (physical activity or dietary intake) offers most possibilities for improvement | Consciousness raising<br>Feedback                      | Video-text intervention: participants will fill out a questionnaire about their physical activity pattern and dietary intake. Based on their answers, an actor will give feedback on their behaviors and indicate which behavior change would be best for them.<br>Text-text intervention: this feedback is described in text.                                              |
|                                                                                                                     | Attitude            | Can indicate which behavior change they feel most positive about                                                  | Feedback<br>Decisional balance<br>Counter conditioning | Participants can choose advantages and disadvantages of dietary and physical activity behavior. Advantages will be confirmed, while disadvantages will be countered. It will also be indicated which behavior change they are most positive about.                                                                                                                          |

|                                                                                             |                  |                                                                                  |                                                                      |                                                                                                                                                                                                                                                              |
|---------------------------------------------------------------------------------------------|------------------|----------------------------------------------------------------------------------|----------------------------------------------------------------------|--------------------------------------------------------------------------------------------------------------------------------------------------------------------------------------------------------------------------------------------------------------|
|                                                                                             | Self-efficacy    | Can indicate for which behavior change they have the highest level of confidence | Feedback<br>Decisional balance                                       | Participants will answer self-efficacy questions and based on their answers, it will be indicated which behavior change they are most confident about.                                                                                                       |
|                                                                                             | Social influence | Can indicate for which behavior change they will receive most social support     | Feedback<br>Information about others' approval<br>Decisional balance | Participants will answer social influence questions and based on their answers, it will be indicated for which behavior change they will get most support. They will also receive information about the use of social support.                               |
| 3. Individuals make plans (action and preparatory) for how to carry out the behavior change | Knowledge        | Can explain how to make plans                                                    | Providing information                                                | Participants will receive information about the structure of good plans and how they can identify the most personal relevant 'if' and 'then'.                                                                                                                |
|                                                                                             | Self-efficacy    | Are able to make plans where they are confident about                            | Guided practice<br>Persuasion                                        | Participants will be shown examples of good plans and informed how they can make plans step by step.                                                                                                                                                         |
|                                                                                             | Skills           | Apply information to make plans                                                  | Implementation intentions<br>Providing information                   | Based on the 'if-then' format, participants will make plans for how to carry out the behavior change.                                                                                                                                                        |
| 4. Individuals start with the chosen behavior change                                        | Self-efficacy    | Express confidence in ability to perform desired behavior                        | Persuasion                                                           | The plans and goals will be summarized and participants will be explained that by using their plans they are capable of performing the desired behavior.                                                                                                     |
|                                                                                             | Skills           | Are able to perform the desired behavior                                         | Providing information                                                | Video-text intervention: an actor will give information about how to apply action and preparatory plans in practice.<br>Text-text intervention: this information is described in text.                                                                       |
| 5. Individuals monitor their behavior and weight                                            | Skills           | Are able to monitor behavior change and compare it with goal                     | Self-reevaluation                                                    | Video-text intervention: an actor will instruct participants to compare their behavior with the desired behavior as specified in their plans.<br>Text-text intervention: this information is described in text.                                              |
|                                                                                             | Self-efficacy    | Have confidence to deal with deviations from the desired behavior                | Persuasion                                                           | Video-text intervention: an actor will inform participants how they can monitor their behavior and how to take action when the desired behavior is not performed adequately.<br>Text-text intervention: this information is described in text.               |
| 6. Individuals make coping plans how to deal with difficulties during the behavior change   | Knowledge        | Can explain how to deal with difficult situations                                | Providing information                                                | Participants will receive information about how to deal with expected or encountered difficult situations during the behavior change.                                                                                                                        |
|                                                                                             | Self-efficacy    | Are able to make coping plans where they are confident about                     | Guided practice<br>Modeling                                          | Participants will be shown examples of good coping plans and informed how they can make coping plans step by step. They will also receive examples of how other people (i.e. actors) deal with difficult situations during the behavior change (narratives). |
|                                                                                             | Skills           | Apply information to make coping plans                                           | Implementation intentions<br>Providing information                   | Based on the 'if-then' format, participants will make coping plans for how to deal with difficult situations.                                                                                                                                                |

|                                                                                                              |               |                                                        |                                                     |                                                                                                                                                                                                                                                                                                                                                                                                                                        |
|--------------------------------------------------------------------------------------------------------------|---------------|--------------------------------------------------------|-----------------------------------------------------|----------------------------------------------------------------------------------------------------------------------------------------------------------------------------------------------------------------------------------------------------------------------------------------------------------------------------------------------------------------------------------------------------------------------------------------|
| 7. Individuals evaluate their behavior change                                                                | Awareness     | Recognize when behavior change is (un)successful       | Consciousness raising<br>Feedback                   | Video-text intervention: an actor will indicate whether or not participants have achieved their behavior change goal by comparing participants' current behavior with their behavior at the start of the program. Below this video message, a table will be shown that provides an overview of participants' current and previous behavior.<br>Text-text intervention: this feedback is described in text and includes the same table. |
|                                                                                                              | Self-efficacy | Have confidence about how to evaluate behavior change  | Reinforcement<br>External attribution<br>Modeling   | Video-text intervention: an actor will reinforce participants who achieved their behavior change goal. Failure will be attributed to external factors. Multiple actors will further also act in role model stories (narratives) by serving as examples of how other people deal with (un)successful behavior changes.<br>Text-text intervention: this feedback and the narratives are described in text.                               |
| 8. Individuals evaluate their weight change                                                                  | Awareness     | Recognize when weight change is (un)successful         | Consciousness raising<br>Feedback                   | Video-text intervention: an actor will indicate whether or not participants achieved their weight goal by comparing participants' current weight with their weight at the start of the program. Below this video message, a table will be shown that provides an overview of participants' weight during the program.<br>Text-text intervention: this feedback is described in text and includes the same table.                       |
|                                                                                                              | Self-efficacy | Have confidence about how to evaluate weight change    | Reinforcement<br>External attribution<br>Modeling   | Video-text intervention: an actor will reinforce participants who have achieved their weight goal. Failure will be attributed to external factors. Multiple actors will further also act in role model stories (narratives) by serving as examples of how other people deal with (un)successful weight changes.<br>Text-text intervention: this feedback and the narratives are described in text.                                     |
| 9. Individuals decide to maintain the behavior change or to make a new behavior change (and go back to PO 2) | Awareness     | Are aware of their weight and behavior change progress | Consciousness raising<br>Feedback                   | Video-text intervention: an actor will indicate whether or not participants achieved their weight and behavior change goals.<br>Text-text intervention: this information is described in text.                                                                                                                                                                                                                                         |
|                                                                                                              | Self-efficacy | Have confidence in weight and behavior change goals    | Persuasion<br>Reinforcement<br>External attribution | Video-text intervention: an actor will indicate that participants who achieved their weight goal successfully can try to make a more challenging behavior change. Participants who failed to achieve their weight goal will be asked if they want to make an easier behavior change.<br>Text-text intervention: this information is described in text.                                                                                 |

|                                              |               |                                                       |                                     |                                                                                                                                                                                                                                       |
|----------------------------------------------|---------------|-------------------------------------------------------|-------------------------------------|---------------------------------------------------------------------------------------------------------------------------------------------------------------------------------------------------------------------------------------|
| 10. Individuals maintain the behavior change | Knowledge     | Can tell how to maintain behavior change on long-term | Providing information               | Video-text intervention: an actor will give information about how participants can maintain behavior changes on the long-term.<br>Text-text intervention: this information is described in text.                                      |
|                                              | Skills        | Apply information to set a long-term weight goal      | Providing information               | Participants will set a long-term weight goal by choosing a time period and a desired future weight.                                                                                                                                  |
|                                              | Self-efficacy | Have confidence to maintain behavior change           | Providing information<br>Persuasion | Video-text intervention: an actor will explain that participants can maintain behavior change(s) by means of the skills they have acquired during the intervention.<br>Text-text intervention: this information is described in text. |
|                                              | Intention     | Are motivated to maintain behavior change             | Arguments                           | Video-text intervention: an actor will give factual information about the advantages of maintaining behavior changes on the long-term.<br>Text-text intervention: this information is described in text.                              |
